# Supplementary material for: Characterization of a Novel Regulator of Biofilm Formation in the Pathogen Legionella pneumophila
Source: MDPI journal article supplement (doi:10.3390/biom12020225), 2022-01-27
Supplement: s1 [file s1]

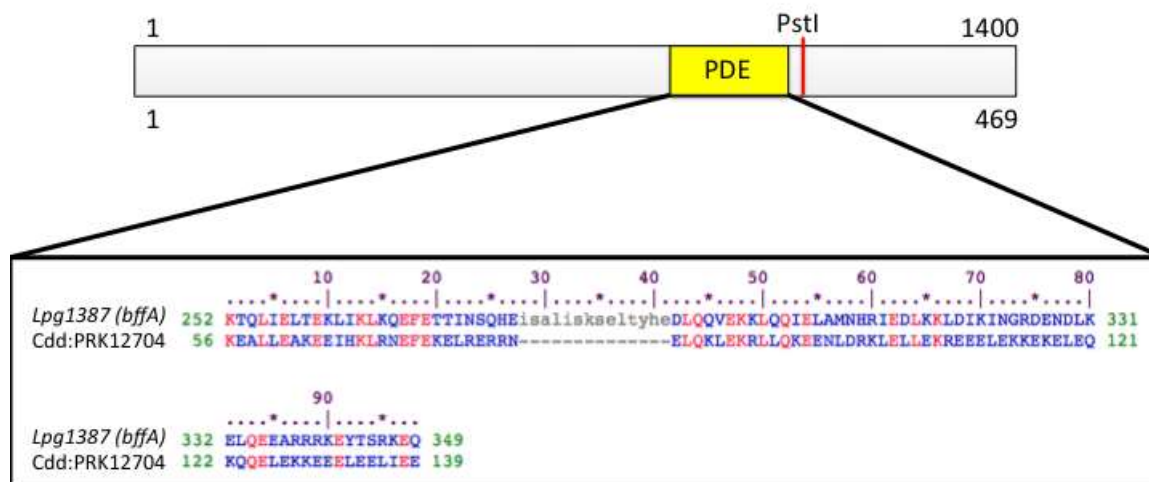

**Figure S1.** Schematic diagram showing the location of the putative phosphodiesterase (PDE) domain of *bffA*. Expanded out, the putative PDE domain sequence is aligned with conserved domain database (CDD) domain PRK12704 from *Haemophilus influenzae* [1].

#### Reference:

1. Lu, S.; Wang, J.; Chitsaz, F.; Derbyshire, M.K.; Geer, R.C.; Gonzales, N.R.; Gwadz, M.; Hurwitz, D.; Marchler, G.H.; Song, G.S.; et al. CDD/SPARCLE: the conserved domain database in 2020. *Nucleic Acids Res.* **2020**, *48*, D265–D268.
